# Supplementary material for: Melatonin Suppressed the Heat Stress-Induced Damage in Wheat Seedlings by Modulating the Antioxidant Machinery
Source: PubMed Central journal article supplement (PMC7412093; doi:10.3390/plants9070809), 2020-06-28
Supplement: plants-09-00809-s001.pdf [file plants-09-00809-s001.pdf]

**Table S1** Effects of melatonin on the morphology of heat stress exposed wheat seedlings.

| Treatments | Shoot fresh weight<br>(g plant <sup>-1</sup> ) | Shoot dry weight<br>(g plant <sup>-1</sup> ) | Root fresh weight<br>(g plant <sup>-1</sup> ) | Root dry weight<br>(g plant <sup>-1</sup> ) |
|------------|------------------------------------------------|----------------------------------------------|-----------------------------------------------|---------------------------------------------|
| CK         | 0.87±0.025a                                    | 0.12±0.03a                                   | 0.65±0.016b                                   | 0.08±0.01ab                                 |
| HS         | 0.61±0.18b                                     | 0.08±0.02c                                   | 0.55±0.15a                                    | 0.06±0.002a                                 |
| MT         | 0.89±0.15b                                     | 0.15±0.06a                                   | 0.75±0.13b                                    | 0.09±0.02a                                  |
| MT+HS      | 0.64±0.16a                                     | 0.14±0.04b                                   | 0.70±0.21a                                    | 0.08±0.02a                                  |

Data represent as a mean of standard deviation (SD) of three replications. Different letters indicate significant differences according to Tukey's HSD test at  $P \leq 0.05$ . Ck-Control; HS: Heat stress (42°C); MT-melatonin (100  $\mu$ M); MT + HS: melatonin (100  $\mu$ M) + heat stress (42 °C)

**Table S2.** Primer sequences used in this study

| Gene Name       | Sequence                             |
|-----------------|--------------------------------------|
| <i>TaMYB80</i>  | F-5'GCCCAATCCGTCTCTACTCTA            |
| <i>TaMYB80</i>  | R-5'AGGTGGAACCCGTACTTGTAT            |
| <i>TaWRKY26</i> | F-5'ATGTCCTCCTCCACGGGGA              |
| <i>TaWRKY26</i> | R-5'CTAGCAGAGGAGCGACTCGACG           |
| <i>TaWRKY39</i> | F-5'TTTGAGCTCAACAATCGTGATTCGTGAT     |
| <i>TaWRKY39</i> | R5'TTTCCATGGTTTTTCTTCTACCCAAGTTTCAGA |
| <i>TaSOD</i>    | F-5'-TCCTTTGACTGGCCCTAATG-3'         |
| <i>TaSOD</i>    | R-5'-CTTCCACCAGCATTTCAGT-3'          |
| <i>TaPOD</i>    | F-5'AGCACACAAGGAGAGAGGAG             |
| <i>TaPOD</i>    | R-5'AAGAGGCACGCGGTATCG               |
| <i>TaCAT</i>    | R: GTGCCTTGCCGATGGTGT                |
| <i>TaCAT</i>    | F: TGCCTGTGTTTTTATCCGAGA             |
